## 18 **Abstract**

19 Leber congenital amaurosis (LCA) is the earliest and most severe form of all inherited retinal  
20 dystrophies (IRD) and the most frequent cause of inherited blindness in children. The phenotypic  
21 overlap with other early-onset and severe IRDs as well as difficulties associated with the ophthalmic  
22 examination of infants can complicate the clinical diagnosis. To date, 25 genes have been implicated  
23 in the pathogenesis of LCA. The disorder is usually inherited in an autosomal recessive fashion,  
24 although rare dominant cases have been reported. We report the mutation spectra and frequency of  
25 genes in 27 German index patients initially diagnosed with LCA. A total of 108 LCA- and other genes  
26 implicated in IRD were analysed using a cost-effective targeted next-generation sequencing  
27 procedure based on molecular inversion probes (MIPs). Sequencing and variant filtering led to the  
28 identification of putative pathogenic variants in 25 cases, thereby leading to a detection rate of 93%.  
29 The mutation spectrum comprises 34 different alleles, 17 of which are novel. In line with previous  
30 studies, the genetic results led to a revision of the initial clinical diagnosis in a substantial proportion  
31 of cases, demonstrating the importance of genetic testing in IRD. In addition, our detection rate of  
32 93% shows that MIPs are a cost-efficient and sensitive tool for targeted next-generation sequencing  
33 in IRD.

34

## 35 Introduction

36 Leber congenital amaurosis (LCA, MIM #204000) was first described by Theodor Leber in 1869 and  
37 refers to a heterogeneous group of severe, mostly recessively inherited, early infantile-onset retinal  
38 dystrophies with typically extinguished electroretinograms (ERGs). Later, a separate group of milder  
39 disease phenotypes, with some preservation of the ERG responses, the so-called “early-onset severe  
40 retinal dystrophy” (EOSRD) or “severe early childhood onset retinal dystrophy” has been described.  
41 LCA and EOSRD together are the most severe and earliest forms of all inherited retinal diseases  
42 (IRDs). They affect 20% of blind children and account for 5% of all IRDs [1]. In Germany, the  
43 estimated number of cases is 2000 (source: Pro Retina Deutschland e. V.). To date, mutations in 25  
44 genes have been associated with LCA (<https://sph.uth.edu/retnet/>). A substantial proportion of cases  
45 (10-20%) remain unsolved despite extensive molecular testing [2-4]. This is due to technical  
46 limitations as copy number variations often remain undetected in datasets derived from capture  
47 panels or whole exome sequencing, but also because of the focus on coding regions in most  
48 diagnostic settings which will not detect deep intronic variants acting on splicing or variants in  
49 regulatory sequences.

50 There is a considerable clinical and genetic overlap between LCA, EOSRD and other types of IRD,  
51 therefore, an accurate clinical diagnosis cannot always be made at the first visit of the young  
52 patients. Furthermore, the clinical examination of infants is challenging or limited. Hence, the initial  
53 clinical diagnosis sometimes has to be revised once genetic results are available.

54 For a long time the genetic heterogeneity of LCA (and IRD in general) hampered DNA-based  
55 (molecular) diagnoses, since parallel screening of all associated genes requires next generation  
56 sequencing approaches, for which reimbursement to the patient is often not guaranteed. We sought  
57 for a cost-effective and sensitive approach to obtain a molecular diagnosis for 27 patients that had  
58 been diagnosed with LCA at the University Eye Hospital Tuebingen. The present study focuses on  
59 these genetically unsolved cases, which were screened for sequence variants in 108 genes associated

60 with non-syndromic IRD by a cost-effective targeted panel-based next-generation sequencing  
61 approach.

62

## 63 **Materials and Methods**

### 64 **Subjects and clinical assessment**

65 In this study we included 27 unrelated patients of German origin with a clinical diagnosis of LCA who  
66 were not genetically pre-investigated. Their clinical diagnosis was established by standard clinical  
67 ophthalmologic examinations including patient history, psychophysical and electrophysiological  
68 examinations. Genomic DNA of patients was extracted from peripheral blood using standard  
69 protocols. Samples from all patients and family members were recruited in accordance with the  
70 principles of the Declaration of Helsinki and were obtained with written informed consent  
71 accompanying the patients' samples. The study was approved by the institutional review board of  
72 the Ethics Committee of the University Hospital of Tuebingen.

73

### 74 **Sequencing analysis**

75 Molecular testing was performed by targeted next-generation sequencing at a core facility  
76 (Department of Human Genetics, Radboud University Nijmegen Medical Centre). We used molecular  
77 inversion probes (MIPs) with 5-bp molecular tags to conduct targeted next generation sequencing of  
78 108 genes associated with IRD (see S1 Table). The 1,524 coding exons and the 10 bp flanking each  
79 exon were targeted with 6,129 probes for an overall target size of 647,574 bp. On average, 4-6 MIPs  
80 cover one exon. The panel also includes the frequent LCA-associated pathogenic intronic variant  
81 c.2992+1655A>G in *CEP290* [5]. Pooled and phosphorylated probes were added to the capture  
82 reactions with 100 ng of genomic DNA from each individual to produce a library for each individual.  
83 The libraries were amplified with 21 cycles of PCR, during which an 8-bp sample barcode was  
84 introduced. The barcoded libraries were then pooled and purified with AMPureXP beads (Beckman-

85 Coulter). Sequencing was performed on an Illumina NextSeq 500 system. Demultiplexed BAM files  
86 were aligned to a human reference sequence (UCSC Genome Browser hg19) via the Burrows-  
87 Wheeler Aligner (BWA) v.0.6.2 [6]. In-house automated data analysis pipeline and variant  
88 interpretation tools were used for variant calling. Rare and potentially disease-causing variants were  
89 confirmed by Sanger sequencing using standard protocols. Sanger sequencing was also used to  
90 screen for the recurrent c.2843G>A/p.C948Y variant in the *CRB1* gene.

91

## 92 **Variant filtering and classification**

93 Only non-synonymous single nucleotide variants (nsSNVs), nonsense variants, putative splice site  
94 ( $\pm 10$  bps) variants, insertions, duplications and deletions represented by more than 20 sequence  
95 reads were considered for further analysis. In addition, variants with a minor allele frequency (MAF)  
96  $> 0.5\%$  in the Genome Aggregation Database (gnomAD) Version r2.0.2 [7] were excluded from further  
97 investigation. For variant classification we applied the terminology proposed by the American College  
98 of Medical Genetics and Genomics and the Association for Molecular Pathology [8].

99

## 100 ***In silico* predictions**

101 The potential pathogenicity of the missense changes identified in this study was assessed using four  
102 online prediction software tools, namely SIFT (<http://sift.bii.a-star.edu.sg/>) [9], PolyPhen-2  
103 (<http://genetics.bwh.harvard.edu/pph2/>) [10], Mutation Taster ([www.mutationtaster.org/](http://www.mutationtaster.org/)) [11], and  
104 Provean (<http://provean.jcvi.org/>) [12].

105

## 106 **Results**

107 Utilizing our capture panel technology, we were able to obtain an average of 1.2 million reads on  
108 target per sample, with an average coverage of 213 reads per probe. Moreover, an average of 88% of  
109 targeted regions had 10x coverage or more, which was sufficient for accurate variant calling. The

110 pipeline initially called an average of 532 single nucleotide variants and 64 insertions/deletions for  
111 each sample. Putative pathogenic variants were identified in 25/27 index cases (Table 1), thereby  
112 achieving a detection rate of 93%. All putative disease-associated variants were validated by  
113 conventional Sanger sequencing. Homozygosity was observed for eight patients (26%): variants were  
114 seen in true homozygous state in four patients and in apparent homozygous state in four patients,  
115 respectively. Two patients were hemizygous, and compound heterozygosity was observed for four  
116 patients based on the analysis of paternal alleles. *Trans* configuration of variants could not be  
117 demonstrated for 11 patients because DNA of family members was not available and the respective  
118 variants were located too far apart for allelic cloning. In patient 26, a single heterozygous variant in  
119 *IMPG2* was observed. In patient 27, no putative disease-causing variants were identified. The  
120 mutation spectrum comprises 34 different alleles, 17 of which are novel. All novel variants were  
121 deposited to the ClinVar database (<https://www.ncbi.nlm.nih.gov/clinvar/>) [13] with accession codes  
122 provided in Table 1.

123

| Table 1. Putative pathogenic variants in 25 unrelated German patients initially diagnosed with LCA |                 |                |                                          |                                  |                       |               |                                |                                  |                       |               |                       |
|----------------------------------------------------------------------------------------------------|-----------------|----------------|------------------------------------------|----------------------------------|-----------------------|---------------|--------------------------------|----------------------------------|-----------------------|---------------|-----------------------|
| Patient Nr.                                                                                        | Final diagnosis | Gene           | Allele 1                                 | Reference                        | ClinVar accession no. | ACMG category | Allele 2                       | Reference                        | ClinVar accession no. | ACMG category | Segregation performed |
| <b>Solved by putative pathogenic mutations in known LCA genes</b>                                  |                 |                |                                          |                                  |                       |               |                                |                                  |                       |               |                       |
| 1                                                                                                  | LCA             | <i>AIPL1</i>   | c.857A>T/p.D286V                         | this study                       | pending               | VUS           | c.857A>T/p.D286V               | this study                       | pending               | VUS           | yes                   |
| 2                                                                                                  | LCA             | <i>AIPL1</i>   | c.834G>A/p.W278*                         | PMID: 10615133                   | SCV000086966.1        | LP            | c.277+6T>C/p.?                 | this study                       | pending               | VUS           | no                    |
| 3                                                                                                  | LCA             | <i>CEP290</i>  | c.2991+1655A>G/p.[C998*, =]              | PMID: 16909394<br>PMID: 27151457 | SCV000021550.2        | LP            | c.2991+1655A>G/p.[C998*, =]    | PMID: 16909394<br>PMID: 27151457 | SCV000021550.2        | LP            | yes                   |
| 4                                                                                                  | EOSRD           | <i>CRB1</i>    | c.2798G>A/p.C933Y                        | this study                       | pending               | VUS           | c.2843G>A/p.C948Y              | PMID: 10508521                   | SCV000056582.2        | VUS           | yes                   |
| 5                                                                                                  | LCA             | <i>CRB1</i>    | c.4039del/p.T1347Lfs*5                   | this study                       | pending               | LP            | c.2843G>A/p.C948Y              | PMID: 10508521                   | SCV000056582.2        | VUS           | no                    |
| 6                                                                                                  | LCA             | <i>CRB1</i>    | c.410del/p.P137Lfs*11                    | this study                       | pending               | LP            | c.2843G>A/p.C948Y              | PMID: 10508521                   | SCV000056582.2        | VUS           | no                    |
| 7                                                                                                  | LCA             | <i>CRB1</i>    | c.70+1G>A/p.?                            | this study                       | pending               | LP            | c.2042G>A/p.C681Y              | PMID: 11231775                   | SCV000118458.1        | VUS           | yes                   |
| 8                                                                                                  | EOSRD           | <i>CRB1</i>    | c.2308G>A/p.G770S                        | PMID: 27113771                   | SCV000282584.1        | VUS           | c.2843G>A/p.C948Y              | PMID: 10508521                   | SCV000056582.2        | VUS           | no                    |
| 9                                                                                                  | LCA             | <i>CRB1</i>    | c.2072G>A/p.W691*                        | this study                       | pending               | LP            | c.2843G>A/p.C948Y              | PMID: 10508521                   | SCV000056582.2        | VUS           | no                    |
| 10                                                                                                 | LCA             | <i>NMNAT1</i>  | c.12dup/p.E5Rfs*4                        | PMID: 24940029                   | n.a.                  | LP            | c.769G>A/p.E257K               | PMID: 22842231                   | SCV000053426.1        | VUS           | no                    |
| 11                                                                                                 | EOSRD           | <i>RD3</i>     | c.180C>A/p.Y60*                          | PMID: 22531706                   | SCV000222653.1        | LP            | c.180C>A/p.Y60*                | PMID: 22531706                   | SCV000222653.1        | LP            | no                    |
| 12                                                                                                 | LCA             | <i>RPE65</i>   | c.110G>C/p.W37S                          | this study                       | pending               | VUS           | c.722A>G/p.H241R               | this study                       | pending               | VUS           | no                    |
| 13                                                                                                 | LCA             | <i>RPE65</i>   | c.203A>C/p.H68P                          | this study                       | pending               | VUS           | c.825C>G/p.Y275*               | this study                       | pending               | LP            | no                    |
| 14                                                                                                 | LCA             | <i>RPGRIP1</i> | c.2440C>T/p.R814*                        | this study                       | pending               | LP            | c.2440C>T/p.R814*              | this study                       | pending               | LP            | no                    |
| 15                                                                                                 | LCA             | <i>RPGRIP1</i> | c.1303A>T/p.K435*                        | PMID: 27208204                   | SCV000282616.1        | LP            | c.801-25_c.843del              | this study                       | pending               | LP            | yes                   |
| 16                                                                                                 | LCA             | <i>RPGRIP1</i> | c.2941C>T/p.R981*                        | PMID: 28041643                   | SCV000599101.1        | LP            | c.2941C>T/p.R981*              | PMID: 28041643                   | SCV000599101.1        | LP            | no                    |
| 17                                                                                                 | LCA             | <i>RPGRIP1</i> | c.800+1G>A/p.?                           | PMID: 16123401                   | n.a.                  | LP            | c.2718dup/p.N907*              | PMID: 28714225                   | n.a.                  | LP            | yes                   |
| <b>Solved by putative pathogenic mutations in IRD genes not typically associated with LCA</b>      |                 |                |                                          |                                  |                       |               |                                |                                  |                       |               |                       |
| 18                                                                                                 | CRD             | <i>ABCA4</i>   | c.1765del/p.W589Gfs*60                   | this study                       | pending               | LP            | c.1765del/p.W589Gfs*60         | this study                       | pending               | LP            | no                    |
| 19                                                                                                 | CRD             | <i>ABCA4</i>   | c.5461-10T>C/p.[T1821Vfs*13, T1821Dfs*6] | PMID: 15614537<br>PMID: 26976702 | SCV000028574.2        | LP            | c.3377T>C/p.L1126P             | PMID: 25066811                   | SCV000281867.2        | VUS           | no                    |
| 20                                                                                                 | CRD             | <i>ABCA4</i>   | c.3259G>A/E1087K                         | PMID: 9054934                    | SCV000598963.1        | VUS           | c.5917del/p.V1973*             | PMID: 10958763                   | SCV000599004.1        | LP            | no                    |
| 21                                                                                                 | CRD             | <i>ABCA4</i>   | c.5917del/p.V1973*                       | PMID: 10958763                   | SCV000599004.1        | LP            | c.5917del/p.V1973*             | PMID: 10958763                   | SCV000599004.1        | LP            | yes                   |
| 22                                                                                                 | CSNB            | <i>CACNA1F</i> | c.4504C>T/p.R1502*                       | this study                       | pending               | LP            | -                              |                                  |                       |               | no                    |
| 23                                                                                                 | CRD             | <i>CDHR1</i>   | c.634G>A/p.A212T                         | PMID: 16288196                   | n.a.                  | VUS           | c.1132C>T/p.R378W              | this study                       | pending               | VUS           | no                    |
| 24                                                                                                 | RP              | <i>PROM1</i>   | c.1209_1229/p.Q403_S410delinsH           | PMID: 24265693                   | SCV000575406.4        | VUS           | c.1209_1229/p.Q403_S410delinsH | PMID: 24265693                   | SCV000575406.4        | VUS           | yes                   |
| 25                                                                                                 | XRP             | <i>RP2</i>     | c.314G>A/p.C105Y                         | this study                       | pending               | VUS           | -                              |                                  |                       |               | no                    |

LCA, Leber congenital amaurosis; EOSRD, early-onset severe retinal dystrophy; CRD, cone-rod dystrophy; CSNB, congenital stationary nightblindness; RP, retinitis pigmentosa; XRP, X-linked RP; VUS, variant of uncertain significance; LP, likely pathogenic; n.a., not available.

127 The variants comprise 14 missense variants, eight nonsense variants, seven deletions or duplications  
 128 leading to a frame-shift, three canonical splice site variants, two non-canonical splice site variants  
 129 and one in-frame deletion. Pathogenicity was interpreted in accordance with the American College of  
 130 Medical Genetics guidelines [8]. The respective categories are given in Table 1. Missense variants  
 131 that have never been reported before were analysed using different *in silico* prediction algorithms.  
 132 These scores, together with the MAFs sourced from the gnomAD browser are shown in Table 2.

| Table 2. Assessment of pathogenicity of missense variants identified in this study |                    |            |                        |                          |                  |                      |        |                |
|------------------------------------------------------------------------------------|--------------------|------------|------------------------|--------------------------|------------------|----------------------|--------|----------------|
| Gene                                                                               | Variant            | gnomAD MAF | Mutation Taster        | Polyphen                 | SIFT             | Provean              | phyloP | Grantham Score |
| <b>ABCA4</b>                                                                       | c.3377T>C/p.L1126P | 4.061e-6   | Disease causing (0.99) | Probably damaging (1.0)  | Damaging (0.0)   | Deleterious (-6.51)  | 3.60   | 98             |
| <b>ABCA4</b>                                                                       | c.3259G>A/E1087K   | 1.624e-5   | Disease causing (0.99) | Probably damaging (1.0)  | Damaging (0.0)   | Deleterious (-3.84)  | 6.22   | 56             |
| <b>AIPL1</b>                                                                       | c.857A>T/p.D286V   | none       | Disease causing (0.99) | Probably damaging (1.0)  | Damaging (0.0)   | Deleterious (-8.31)  | 4.09   | 152            |
| <b>CDHR1</b>                                                                       | c.634G>A/p.A212T   | 0.0001312  | Disease causing (0.99) | Probably damaging (0.99) | Damaging (0.0)   | Deleterious (-3.22)  | 4.93   | 58             |
| <b>CDHR1</b>                                                                       | c.1132C>T/p.R378W  | 7.584e-5   | Disease causing (0.99) | Probably damaging (1.0)  | Damaging (0.02)  | Deleterious (-3.84)  | 1.25   | 101            |
| <b>CRB1</b>                                                                        | c.2798G>A/p.C933Y  | none       | Disease causing (0.99) | Probably damaging (0.99) | Damaging (0.0)   | Deleterious (-9.66)  | 5.69   | 194            |
| <b>CRB1</b>                                                                        | c.2308G>A/p.G770S  | 2.036e-5   | Disease causing (0.99) | Probably damaging (1.0)  | Tolerated (0.06) | Deleterious (-5.48)  | 5.69   | 56             |
| <b>CRB1</b>                                                                        | c.2843G>A/p.C948Y  | 0.0002027  | Disease causing (0.99) | Probably damaging (0.99) | Damaging (0.0)   | Deleterious (-9.66)  | 5.31   | 194            |
| <b>CRB1</b>                                                                        | c.2042G>A/p.C681Y  | 4.067e-6   | Disease causing (0.99) | Probably damaging (1.0)  | Damaging (0.0)   | Deleterious (-10.74) | 5.74   | 194            |
| <b>NMNAT1</b>                                                                      | c.769G>A/p.E257K   | 0.0006968  | Disease causing (0.99) | Benign (0.09)            | Tolerated (0.52) | Neutral (-2.31)      | 3.87   | 56             |
| <b>RP2</b>                                                                         | c.314G>A/p.C105Y   | none       | Disease causing (0.99) | Probably damaging (1.0)  | Damaging (0.0)   | Deleterious (-8.6)   | 5.50   | 194            |
| <b>RPE65</b>                                                                       | c.110G>C/p.W37S    | none       | Disease causing (0.99) | Probably damaging (1.0)  | Damaging (0.02)  | Deleterious (-12.62) | 5.78   | 177            |
| <b>RPE65</b>                                                                       | c.722A>G/p.H241R   | none       | Disease causing (0.99) | Probably damaging (1.0)  | Damaging (0.0)   | Deleterious (-7.58)  | 4.74   | 29             |
| <b>RPE65</b>                                                                       | c.203A>C/p.H68P    | none       | Disease causing (0.99) | Probably damaging (1.0)  | Tolerated (0.06) | Deleterious (-9.34)  | 4.78   | 77             |

133 MAF, minor allele frequency.

134

## 135 LCA / EOSRD patients

136 A summary of clinical findings is shown in Table 3 including all 27 index patients. In 19 of 27 patients,  
 137 the initial diagnosis of LCA/EOSRD was confirmed by the molecular genetic analysis. In all of these  
 138 cases, disease onset was typically at birth or within the first months of life. Nystagmus and  
 139 strabismus were common features, indicating the lack of visual development. Visual acuity was  
 140 severely reduced in all cases, ranging from 0.2 (decimal) to no light perception (NLP). Where visual  
 141 field testing was possible, only small residual visual islands could be detected. Fullfield ERGs were  
 142 extinguished in each case at time of recording. Morphological findings included typical salt & pepper  
 143 pigmentary changes of the retina, pale optic disks and attenuated retinal vessels. Patients showed a



144 progressive disease history with severe visual impairment from the beginning. In the following, the

145 LCA-associated genes that were found to be mutated in these patients are listed in detail.

146

| Patient Nr. | Current age (years), Gender | Genetic findings                                                                     | Revised diagnosis | Disease onset | BCVA OD OS   | Nystagmus | Cataract | Strabism | Fundus pigmentary changes | Other findings                     |
|-------------|-----------------------------|--------------------------------------------------------------------------------------|-------------------|---------------|--------------|-----------|----------|----------|---------------------------|------------------------------------|
| 1           | 50 / m                      | <b>AIPL1</b><br>c.857A>T/p.D286V homozygous                                          | LCA               | 6 months      | 1/35<br>1/35 | yes       | yes      | yes      | S&P                       | no                                 |
| 2           | 31 / m                      | <b>AIPL1</b><br>c.834G>A/p.W278* heterozygous<br>c.277+6T>C/p.? heterozygous         | LCA               | n.a.          | CF<br>CF     | yes       | no       | yes      | S&P                       | no                                 |
| 3           | 8 / f                       | <b>CEP290</b><br>c.2991+1655A>G/p.[Cys998*, =] homozygous                            | LCA               | birth         | n.a.         | yes       | no       | yes      | n.a.                      | no                                 |
| 4           | 45 / f                      | <b>CRB1</b><br>c.2798G>A/p.C933Y heterozygous<br>c.2843G>A/p.C948Y heterozygous      | EOSRD             | childhood     | LP<br>HM     | yes       | no       | yes      | S&P                       | n.a.                               |
| 5           | 61 / m                      | <b>CRB1</b><br>c.4039del/p.T1347Lfs*5 heterozygous<br>c.2843G>A/p.C948Y heterozygous | LCA               | birth         | n.a.         | yes       | yes      | n.a.     | n.a.                      | n.a.                               |
| 6           | 25 / f                      | <b>CRB1</b><br>c.410del/p.P137Lfs*11 heterozygous<br>c.2843G>A/p.C948Y heterozygous  | LCA               | 6 months      | n.a.         | yes       | no       | yes      | S&P                       | no                                 |
| 7           | 27 / m                      | <b>CRB1</b><br>c.70+1G>A/p.? heterozygous<br>c.2042G>A/p.C681Y heterozygous          | LCA               | 9 months      | 1/35<br>1/35 | yes       | no       | yes      | S&P                       | no                                 |
| 8           | 55 / f                      | <b>CRB1</b><br>c.2308G>A/p.G770S heterozygous<br>c.2843G>A/p.C948Y heterozygous      | EOSRD             | 3 years       | LP<br>LP     | n.a.      | yes      | n.a.     | S&P                       | anti-phospholipid syndrome, asthma |
| 9           | 28 / m                      | <b>CRB1</b><br>c.2072G>A/p.W691* heterozygous<br>c.2843G>A/p.C948Y heterozygous      | LCA               | birth         | 1/5<br>1/5   | yes       | no       | yes      | n.a.                      | n.a.                               |
| 10          | 48 / f                      | <b>NMNAT1</b><br>c.12dup/p.E5Rfs*4 heterozygous<br>c.769G>A/p.E257K heterozygous     | LCA               | birth         | LP<br>LP     | yes       | yes      | n.a.     | n.a.                      | n.a.                               |
| 11          | 20 / f                      | <b>RD3</b><br>c.180C>A/p.Y60* homozygous                                             | EOSRD             | 2 years       | LP<br>LP     | yes       | no       | yes      | n.a.                      | no                                 |
| 12          | 36 / m                      | <b>RPE65</b><br>c.110G>C/p.W37S heterozygous<br>c.722A>G/p.H241R heterozygous        | LCA               | birth         | 1/50<br>1/35 | yes       | no       | yes      | S&P                       | n.a.                               |
| 13          | 48 / f                      | <b>RPE65</b><br>c.203A>C/p.H68P heterozygous<br>c.825C>G/p.Y275* heterozygous        | LCA               | birth         | HM<br>1/50   | yes       | no       | yes      | n.a.                      | n.a.                               |
| 14          | 26 / f                      | <b>RPGRIP1</b><br>c.2440C>T/p.R814* homozygous                                       | LCA               | birth         | NLP<br>NLP   | yes       | no       | yes      | S&P                       | no                                 |
| 15          | 36 / m                      | <b>RPGRIP1</b><br>c.1303A>T/p.K435* heterozygous<br>c.801-25_c.843del heterozygous   | LCA               | 6 months      | HM<br>HM     | yes       | no       | yes      | n.a.                      | no                                 |
| 16          | 47 / m                      | <b>RPGRIP1</b><br>c.2941C>T/p.R981* homozygous                                       | LCA               | n.a.          | LP<br>LP     | yes       | yes      | yes      | S&P                       | no                                 |
| 17          | 17 / f                      | <b>RPGRIP1</b><br>c.800+1G>A/p.? heterozygous<br>c.2718dup/p.N907* heterozygous      | LCA               | birth         | 1/10<br>1/10 | yes       | no       | yes      | S&P                       | no                                 |
| 18          | 33 / f                      | <b>ABCA4</b><br>c.1765del/p.W589Gfs*60 homozygous                                    | CRD               | 3 years       | n.a.         | n.a.      | n.a.     | n.a.     | n.a.                      | n.a.                               |
| 19          | 47 / f                      | <b>ABCA4</b><br>c.5461-10T>C/p.[T1821Vfs*13, T1821Dfs*6] heterozygous                | CRD               | 7 years       | 1/35<br>1/35 | yes       | no       | yes      | S&P                       | n.a.                               |

|    |        |                                                                                  |       |           |              |      |     |      |       |                                                   |  |
|----|--------|----------------------------------------------------------------------------------|-------|-----------|--------------|------|-----|------|-------|---------------------------------------------------|--|
|    |        | c.3377T>C/p.L1126P heterozygous                                                  |       |           |              |      |     |      |       |                                                   |  |
| 20 | 44 / m | <b>ABCA4</b><br>c.3259G>A/E1087K heterozygous<br>c.5917del/p.V1973* heterozygous | CRD   | n.a.      | LP<br>LP     | n.a. | yes | n.a. | dense | no                                                |  |
| 21 | 18 / f | <b>ABCA4</b><br>c.5917del/p.V1973* homozygous                                    | CRD   | childhood | LP<br>LP     | n.a. | no  | n.a. | dense | no                                                |  |
| 22 | 20 / m | <b>CACNA1F</b><br>c.4504C>T/p.R1502* hemizygous                                  | CSNB  | birth     | 1/6<br>1/10  | yes  | no  | no   | no    | no                                                |  |
| 23 | 35 / f | <b>CDHR1</b><br>c.634G>A/p.A212T heterozygous<br>c.1132C>T/p.R378W heterozygous  | CRD   | n.a.      | HM<br>HM     | yes  | no  | yes  | S&P   | renal insufficiency, hyperparathyroidism, obesity |  |
| 24 | 50 / m | <b>PROM1</b><br>c.1209_1229/p.Q403_S410delinsH homozygous                        | RP    | 16 years  | LP<br>LP     | yes  | yes | yes  | S&P   | no                                                |  |
| 25 | 45 / m | <b>RP2</b><br>c.314G>A/p.C105Y hemizygous                                        | XRP   | childhood | 1/35<br>1/35 | yes  | no  | yes  | n.a.  | no                                                |  |
| 26 | 39 / m | <b>IMPG2</b><br>c.370T>C/p.F124L single heterozygous                             | LCA   | 4 years   | n.a.         | yes  | no  | yes  | n.a.  | no                                                |  |
| 27 | 12 / m | nothing of immediate interest                                                    | EOSRD | 3 years   | 1/20<br>1/20 | no   | no  | yes  | S&P   | no                                                |  |

147 BCVA, best corrected visual acuity; OD, right eye; OS, left eye; m, male; f, female; LCA, Leber congenital amaurosis; EOSRD, early-onset  
 148 severe retinal dystrophy; CRD, cone-rod dystrophy; CSNB, congenital stationary nightblindness; RP, retinitis pigmentosa; XRP, X-linked RP;  
 149 CF, counting fingers; HM, hand movement; LP, light perception; NLP, no light perception; S&P, salt and pepper.

150

## 151 **CRB1**

152 *CRB1* variants were detected in six patients (22.2%; 6/27). In total, eight variants were identified,  
 153 including one novel nonsense, two novel frame-shifting deletions, one novel canonical splice site  
 154 variant and one novel missense variant. Compound heterozygosity could only be demonstrated in  
 155 two patients. Five patients were heterozygous for the recurrent c.2843G>A/p.C948Y variant, which  
 156 has been reported to represent 23–31% of all *CRB1* disease-associated alleles [14-15]. Of note, this  
 157 particular variant was not covered by the MIPs in our assay, but we screened all patients by  
 158 conventional Sanger Sequencing for this variant, because of its known high frequency and relevance  
 159 (MAF 0.0002027).

160

## 161 **RPGRIP1**

162 Of the six potentially disease-causing variants in *RPGRIP1* detected in four patients (14.8%; 4/27), all  
 163 represent likely null alleles and three were novel. Compound heterozygosity of a reported nonsense  
 164 variant and a novel 68-bp deletion was demonstrated for one patient. One patient harbored a

165 reported canonical splice site variant on one allele and a novel frame-shifting duplication on the  
166 other allele. Two patients were homozygous for two different nonsense variants, one of them novel.

167

### 168 ***RPE65***

169 A total of four novel variants in *RPE65* were identified in two patients (7.4%; 2/27), including one  
170 nonsense and three missense. Biallelism could not be formally proven in both cases.

171

### 172 ***AIPL1***

173 Of the three variants detected in two affected individuals in *AIPL1* (7.4%; 2/27), there was one novel  
174 missense variant found in homozygous state in one patient. Another patient harbored a nonsense  
175 variant and a non-canonical splice site change. Whether the variants are in *trans* configuration in this  
176 patient could not be established.

177

### 178 ***RD3***

179 One patient was found to be homozygous for a known nonsense variant in *RD3* (3.7%; 1/27).

180

### 181 ***NMNAT1***

182 *NMNAT1* variants were detected in one patient (3.7%; 1/27) who possessed one reported frame-  
183 shifting duplication and the known hypomorphic variant c.769G>A/p.E257K [16]. Biallelism could not  
184 be confirmed due to lack of additional family DNA samples.

185

### 186 ***CEP290***

187 One patient was found to be homozygous for the common c.2991+1655A>G/p.C998\* allele which  
188 causes insertion of a cryptic exon and subsequent truncation [5,17].

189

## 190 Other patients

191 In addition to the cases described above, we identified eight patients (30%) who harbored  
192 pathogenic variants in genes not typically associated with LCA. Clinical re-evaluation of these cases  
193 led to a revision of the initial clinical diagnosis in all of them. Within this group, *ABCA4* was the most  
194 frequently mutated gene, as biallelic variants were seen in four patients. In these cases, a later onset  
195 of disease and a dense pigmentation of the retina were observed (Table 3). After genetic testing and  
196 re-evaluation of clinical data, the diagnosis was corrected to cone-rod dystrophy (CRD),  
197 demonstrating severe morphological and functional damage in all cases.

198 In addition, we found a male patient to be hemizygous for a pathogenic variant in *RP2*. He had been  
199 initially diagnosed in adult age with severely progressed retinal degeneration. Consequently, his  
200 diagnosis was corrected to X-linked retinitis pigmentosa.

201 Another male patient was shown to be hemizygous for a pathogenic variant in *CACNA1F*. He was  
202 suffering from nystagmus, night blindness, photophobia and very poor vision since birth. His fullfield  
203 ERGs showed residual photopic and scotopic responses. Morphologically, slight attenuation of the  
204 retinal vessels, changes in the macular reflexes and only minimal peripheral pigmentary changes  
205 could be observed. In this case, the diagnosis was changed to X-linked congenital stationary night  
206 blindness (CSNB).

207 One patient harbored pathogenic variants in *CDHR1*. The revised clinical diagnosis in this case was  
208 CRD, but interestingly, this female patient also suffered from renal insufficiency, secondary  
209 hyperparathyroidism and obesity. Whether these symptoms can be considered as a unique disease  
210 identity or syndrome remains unexplained. So far, such extra-ocular symptoms have not been  
211 described as a feature of *CDHR1*-related disease but would be typical features of a ciliopathy to  
212 which *CDHR1*-associated IRD does not belong to.

213 The last male patient presented in our clinic with a severe retinal degeneration at the age of 50 years  
214 and was found to be homozygous for an in-frame insertion/deletion in *PROM1*. On the basis of

215 patient history, clinical findings and genetic results, the clinical diagnosis was changed to autosomal  
216 recessive retinitis pigmentosa.

217

## 218 Discussion

219 In a cohort of 27 German patients initially diagnosed with LCA, we were able to identify sequence  
220 variants likely explaining the disease phenotype in 25 cases (93%) by applying a cost-efficient  
221 targeted next-generation sequencing approach designed at the Department of Human Genetics,  
222 Radboud University Medical Center, Nijmegen, The Netherlands. The MIP panel targets 108 known  
223 IRD genes, including 22 genes that are associated with LCA, that were reported in October 2013.

224 Undoubtedly, those LCA genes with the highest disease-causing variant load have already been  
225 discovered. However, the fact that half of the variants (17/34) we identified are novel suggests that  
226 the mutation spectrum of LCA and other IRD genes is far from being saturated and confirms the  
227 known genetic heterogeneity of IRD in an outbred European population.

228 The most frequently mutated LCA genes in our cohort were *CRB1* (6 cases, 22%) and *RPGRIP1* (4  
229 cases, 15%). Among the six patients with *CRB1* mutations, five carried the recurrent p.C948Y variant  
230 on one allele, which is known to be a founder mutation [18]. We only identified one patient with a  
231 *CEP290* variant in our cohort, despite *CEP290* being one of the most frequently mutated LCA genes in  
232 different populations [5, 19], but this is due to the fact that most patients in the present study had  
233 already been pre-screened for the recurrent pathogenic intronic variant c.2992+1655A>G.

234 Several criteria were considered to evaluate the potential pathogenicity of variants: (1) variants have  
235 previously been reported to be pathogenic, (2) variants are observed only in few heterozygous cases  
236 or are absent among 277,264 general population alleles sourced from gnomAD browser; (3) variants  
237 represent likely null alleles (nonsense, canonical splice site and frame-shift variants), and (4) in the  
238 case of missense variants they are predicted to be damaging by *in silico* prediction algorithms. In  
239 addition, all variants were classified according to their pathogenicity based on the American College  
240 of Medical Genetics and Genomics (ACMG) guidelines [8]. With nonsense, canonical splice site and

241 frame-shifting variants having a strong weight in the ACMG scoring system, this class of variants are  
242 consequently classified either as likely pathogenic or pathogenic, whereas missense variants that lack  
243 segregation data and functional analyses to support a damaging effect are always classified as  
244 variants of uncertain significance (VUS). To compensate for this simplistic categorization of the ACMG  
245 classification system, we provide *in silico* predictions from four algorithms for all missense variants  
246 identified in this study, regardless of having been reported previously or not, along with phyloP  
247 scores, Grantham differences and MAFs sourced from the gnomAD browser (Table 2). The extremely  
248 low MAF or even the absence in the gnomAD browser, the evolutionary conservation as well as the  
249 type of the respective amino acid substitution are strong indicators that all missense variants we  
250 identified and reported are indeed pathogenic. One missense variant that is predicted to be benign  
251 by the majority of algorithms is the recurrent c.769G>A/p.E257K variant in *NMNAT1*, but it has been  
252 shown previously that this is a hypomorphic variant and almost always causes LCA in combination  
253 with more severe alleles [16].

254 Apart from the fact that we lack segregation data for several patients, the only case that is left with  
255 some level of uncertainty is patient LCA 108 who carries a nonsense variant and a non-canonical  
256 splice site variant in *AIPL1*. The latter is a transition of T to C at position +6 of the splice donor of exon  
257 2. It is absent in the gnomAD browser, but since the +6 position is not invariable, we performed an *in*  
258 *silico* prediction. The bioinformatic tool Human Splicing Finder [20] predicts that the c.277+6T>C  
259 variant breaks the natural splice donor site, since the mutant score is reduced by 41% compared to  
260 the wildtype score when using maximum entropy as the algorithm type. However, since *AIPL1* is not  
261 expressed in accessible tissues like blood or skin fibroblasts, mRNA analyses to confirm the *in silico*  
262 prediction are not feasible. Sanger sequencing of the entire coding region of *AIPL1* in this patient  
263 revealed no other variants than c.834G>A/p.W278\* and c.277+6T>C. While most cases with  
264 mutations in *AIPL1* are biallelic, certain mutations may result in dominant cone-rod dystrophy or  
265 juvenile retinitis pigmentosa [21], however, this most probably is not the case for loss of function

266 alleles like the c.834G>A/p.W278\* variant in our patient. Of course, we cannot rule out that the  
267 phenotype of our patient might not be related to *AIP1* at all.

268 The different forms of IRD may present with considerable clinical overlap [22]. This often precludes  
269 the assessment of a diagnosis on the basis of the disease phenotype alone, no matter how  
270 experienced and meticulous the clinician might be. Hence, we were not surprised that eight patients  
271 in our cohort (30%) were found to carry pathogenic variants in genes not typically associated with  
272 LCA. We reassessed the clinical data of these patients and revisited the initial diagnosis in all of them.  
273 A recently published study on Brazilian patients with LCA found the same proportion (i.e. 30%) of  
274 patients that were solved by identifying variants in non-LCA genes [23]. This impressively  
275 demonstrates how a molecular diagnosis can help to refine a clinical diagnosis.

276 The underlying variants in two patients remained unresolved (7.4%; 2/27). One of these patients was  
277 found to be heterozygous for a known missense variant in *IMPG2*. Biallelic mutations in *IMPG2* are a  
278 known cause for RP [24]. All exons and adjacent intronic regions of this gene were sufficiently  
279 covered which excludes the existence of a second variant in the coding region. Whether non-coding  
280 deep-intronic variants or large deletions in the *IMPG2* gene account for the second pathogenic allele  
281 in this patient remains unknown.

282 Supposing that all patients in whom we could not confirm *trans* configuration of variants are indeed  
283 biallelic, our detection rate is 93%. This is in line with recent studies for LCA which achieved 80-90%  
284 in panel-based approaches [2-3] and 89% by whole exome/genome sequencing [4]. Analysis of our  
285 sequencing data revealed several regions with low or no coverage, as for instance for parts of exon 6  
286 of *CRB1*. We would have missed several patients carrying the recurrent c.2843G>A/p.C948Y variant  
287 in this gene, had we not re-sequenced this exon in all patients with conventional Sanger sequencing.  
288 It would be interesting to know whether we would have achieved a detection rate of 100% had all  
289 genes in our panel been sufficiently covered.

290 Several studies have shown that whole exome sequencing (WES) and whole genome sequencing  
291 (WGS) can outperform targeted sequencing approaches in terms of variant detection [4, 25-27]. In

292 fact, NHS England is already planning to commission WGS into routine clinical care pathways [28].  
293 However, targeted sequencing approaches have several benefits, including a higher coverage rate for  
294 targeted regions and higher throughput in terms of patient numbers. What is more important, they  
295 are associated with considerable lower costs, which is relevant for those patients who cannot expect  
296 reimbursement from their health care provider or have no health insurance at all. The MIP  
297 technology we used can be as low as € 80 per sample per gene panel, which is 10 to 20 times lower  
298 than the price tag for other NGS-based sequencing procedures. Reaching a detection rate of 93%, we  
299 could demonstrate that MIPs are a cost-efficient and sensitive tool for targeted next-generation  
300 sequencing in IRD.

301

## 302 **Acknowledgements**

303 This work was supported by grants from the Pro Retina Germany Foundation (Pro-  
304 Re/Project/Zobor.1-2016) of NW, BF, SK and DZ and by the Curing Retinal Blindness Foundation and  
305 the Candle in the Dark-Childvision Research Fund, managed by the King Baudouin Foundation to  
306 FPMC and MIK. We further acknowledge support by the Deutsche Forschungsgemeinschaft and the  
307 Open Access Publishing Fund of the University of Tuebingen.

308

## 309 **References**

- 310 1. Chung DC, Traboulsi EI. Leber congenital amaurosis: clinical correlations with genotypes,  
311 gene therapy trials update, and future directions. J AAPOS. 2009;13: 587-92.
- 312 2. Bernardis I, Chiesi L, Tenedini E, Artuso L, Percesepe A, Artusi V et al. Unravelling the  
313 Complexity of Inherited Retinal Dystrophies Molecular Testing: Added Value of Targeted  
314 Next-Generation Sequencing. Biomed Res Int. 2016;2016: 6341870.



- 315 3. Thompson JA, De Roach JN, McLaren TL, Montgomery HE, Hoffmann LH, Campbell IR et al.  
316 The genetic profile of Leber congenital amaurosis in an Australian cohort. *Mol Genet*  
317 *Genomic Med.* 2017;5: 652-67.
- 318 4. Carss KJ, Arno G, Erwood M, Stephens J, Sanchis-Juan A, Hull S et al. Comprehensive Rare  
319 Variant Analysis via Whole-Genome Sequencing to Determine the Molecular Pathology of  
320 Inherited Retinal Disease. *Am J Hum Genet.* 2017;100: 75-90.
- 321 5. den Hollander AI, Koenekoop RK, Yzer S, Lopez I, Arends ML, Voeselek KE et al. Mutations in  
322 the CEP290 (NPHP6) gene are a frequent cause of Leber congenital amaurosis. *Am J Hum*  
323 *Genet.* 2006;79: 556-61.
- 324 6. Li H, Durbin R. Fast and accurate short read alignment with Burrows-Wheeler transform.  
325 *Bioinformatics.* 2009;25: 1754-60.
- 326 7. Lek M, Karczewski KJ, Minikel EV, Samocha KE, Banks E, Fennell T et al. Exome Aggregation  
327 Consortium. Analysis of protein-coding genetic variation in 60,706 humans. *Nature.*  
328 2016;536: 285-91.
- 329 8. Richards S, Aziz N, Bale S, Bick D, Das S, Gastier-Foster J et al. ACMG Laboratory Quality  
330 Assurance Committee. Standards and guidelines for the interpretation of sequence variants:  
331 a joint consensus recommendation of the American College of Medical Genetics and  
332 Genomics and the Association for Molecular Pathology. *Genet Med* 2015;17: 405-24.
- 333 9. Kumar P, Henikoff S, Ng PC. Predicting the effects of coding non-synonymous variants on  
334 protein function using the SIFT algorithm. *Nat Protoc* 2009; 4: 1073–81.
- 335 10. Adzhubei IA, Schmidt S, Peshkin L, Ramensky VE, Gerasimova A, Bork P et al. A method and  
336 server for predicting damaging missense mutations. *Nat Methods* 2010;7: 248–249.
- 337 11. Schwarz JM, Cooper DN, Schuelke M, Seelow D. MutationTaster2: mutation prediction for  
338 the deep-sequencing age. *Nat Methods* 2014;11: 361–362.
- 339 12. Choi Y, Chan AP. PROVEAN web server: a tool to predict the functional effect of amino acid  
340 substitutions and indels. *Bioinformatics.* 2015;31:2745-7.

- 341 13. Landrum MJ, Lee JM, Riley GR, Jang W, Rubinstein WS, Church DM et al. ClinVar: Public  
342 archive of relationships among sequence variation and human phenotype. *Nucleic Acids Res.*  
343 2014;42(Database issue): D980-5.
- 344 14. Hanein S, Perrault I, Gerber S, Tanguy G, Barbet F, Ducroq D et al. Leber congenital  
345 amaurosis: comprehensive survey of the genetic heterogeneity, refinement of the clinical  
346 definition, and genotype-phenotype correlations as a strategy for molecular diagnosis. *Hum*  
347 *Mutat.* 2004;23: 306-17.
- 348 15. Corton M, Tatu SD, Avila-Fernandez A, Vallespín E, Tapias I, Cantalapiedra D et al. High  
349 frequency of CRB1 mutations as cause of Early-Onset Retinal Dystrophies in the Spanish  
350 population. *Orphanet J Rare Dis.* 2013;8: 20.
- 351 16. Siemiatkowska AM, van den Born LI, van Genderen MM, Bertelsen M, Zobor D,  
352 Rohrschneider K et al. Novel compound heterozygous NMNAT1 variants associated with  
353 Leber congenital amaurosis. *Mol Vis.* 2014;20: 753-9.
- 354 17. Parfitt DA, Lane A, Ramsden CM, Carr AJ, Munro PM, Jovanovic K et al. Identification and  
355 Correction of Mechanisms Underlying Inherited Blindness in Human iPSC-Derived Optic Cups.  
356 *Cell Stem Cell.* 2016;18: 769-81
- 357 18. den Hollander AI, Roepman R, Koenekoop RK, Cremers FP. Leber congenital amaurosis:  
358 genes, proteins and disease mechanisms. *Prog Retin Eye Res.* 2008;27: 391-419.
- 359 19. Coppieters F, Casteels I, Meire F, De Jaegere S, Hooghe S, van Regemorter N et al. Genetic  
360 screening of LCA in Belgium: predominance of CEP290 and identification of potential modifier  
361 alleles in AHI1 of CEP290-related phenotypes. *Hum Mutat.* 2010;31: E1709-66.
- 362 20. Desmet FO, Hamroun D, Lalande M, Collod-Bérout G, Claustres M, Bérout C. Human Splicing  
363 Finder: an online bioinformatics tool to predict splicing signals. *Nucleic Acids Res.* 2009;37:  
364 e67.

- 365 21. Sohocki MM, Perrault I, Leroy BP, Payne AM, Dharmaraj S, Bhattacharya SS et al. Prevalence  
366 of AIPL1 mutations in inherited retinal degenerative disease. *Mol Genet Metab.* 2000;70:  
367 142-50.
- 368 22. Sahel JA, Marazova K, Audo I. Clinical characteristics and current therapies for inherited  
369 retinal degenerations. *Cold Spring Harb Perspect Med* 2014;5: a017111.
- 370 23. Porto FBO, Jones EM, Branch J, Soens ZT, Maia IM, Sena IFG et al. Molecular Screening of 43  
371 Brazilian Families Diagnosed with Leber Congenital Amaurosis or Early-Onset Severe Retinal  
372 Dystrophy. *Genes (Basel).* 2017;8(12). pii: E355.
- 373 24. Bandah-Rozenfeld D, Collin RW, Banin E, van den Born LI, Coene KL, Siemiatkowska AM et al.  
374 Mutations in IMPG2, encoding interphotoreceptor matrix proteoglycan 2, cause autosomal-  
375 recessive retinitis pigmentosa. *Am J Hum Genet.* 2010;87: 199-208.
- 376 25. Lelieveld SH, Spielmann M, Mundlos S, Veltman JA, Gilissen C. Comparison of Exome and  
377 Genome Sequencing Technologies for the Complete Capture of Protein-Coding Regions. *Hum*  
378 *Mutat* 2015;36: 815-22.
- 379 26. Meienberg J, Bruggmann R, Oexle K, Matyas G. Clinical sequencing: is WGS the better WES?  
380 *Hum Genet* 2016;135: 359-62.
- 381 27. Ellingford JM, Barton S, Bhaskar S, Williams SG, Sergouniotis PI, O'Sullivan J et al. Whole  
382 Genome Sequencing Increases Molecular Diagnostic Yield Compared with Current Diagnostic  
383 Testing for Inherited Retinal Disease. *Ophthalmology* 2016;123: 1143-50.
- 384 28. Turnbull C, Scott RH, Thomas E, Jones L, Murugaesu N, Pretty FB et al. The 100 000 Genomes  
385 Project: bringing whole genome sequencing to the NHS. *BMJ.* 2018;361: k1687.
